# Supplementary material
Source: PubMed Central journal article supplement (PMC3558813)
Supplement: supp_mol.112.082958_2012_Molpharm_Supplemental.pdf [file supp_mol.112.082958_2012_Molpharm_Supplemental.pdf]

Stuart M. Cahalan, Pedro J. Gonzalez-Cabrera, Nhan Nguyen,  
Miguel Guerrero, Elizabeth A. George Cisar, Nora B. Leaf, Steven J. Brown,  
Edward Roberts, and Hugh Rosen

S1P1 Receptor Upregulation and Amelioration of  
Experimental Autoimmune Encephalomyelitis by an S1P1 Antagonist  
Molecular Pharmacology

## Supplemental Figure 1

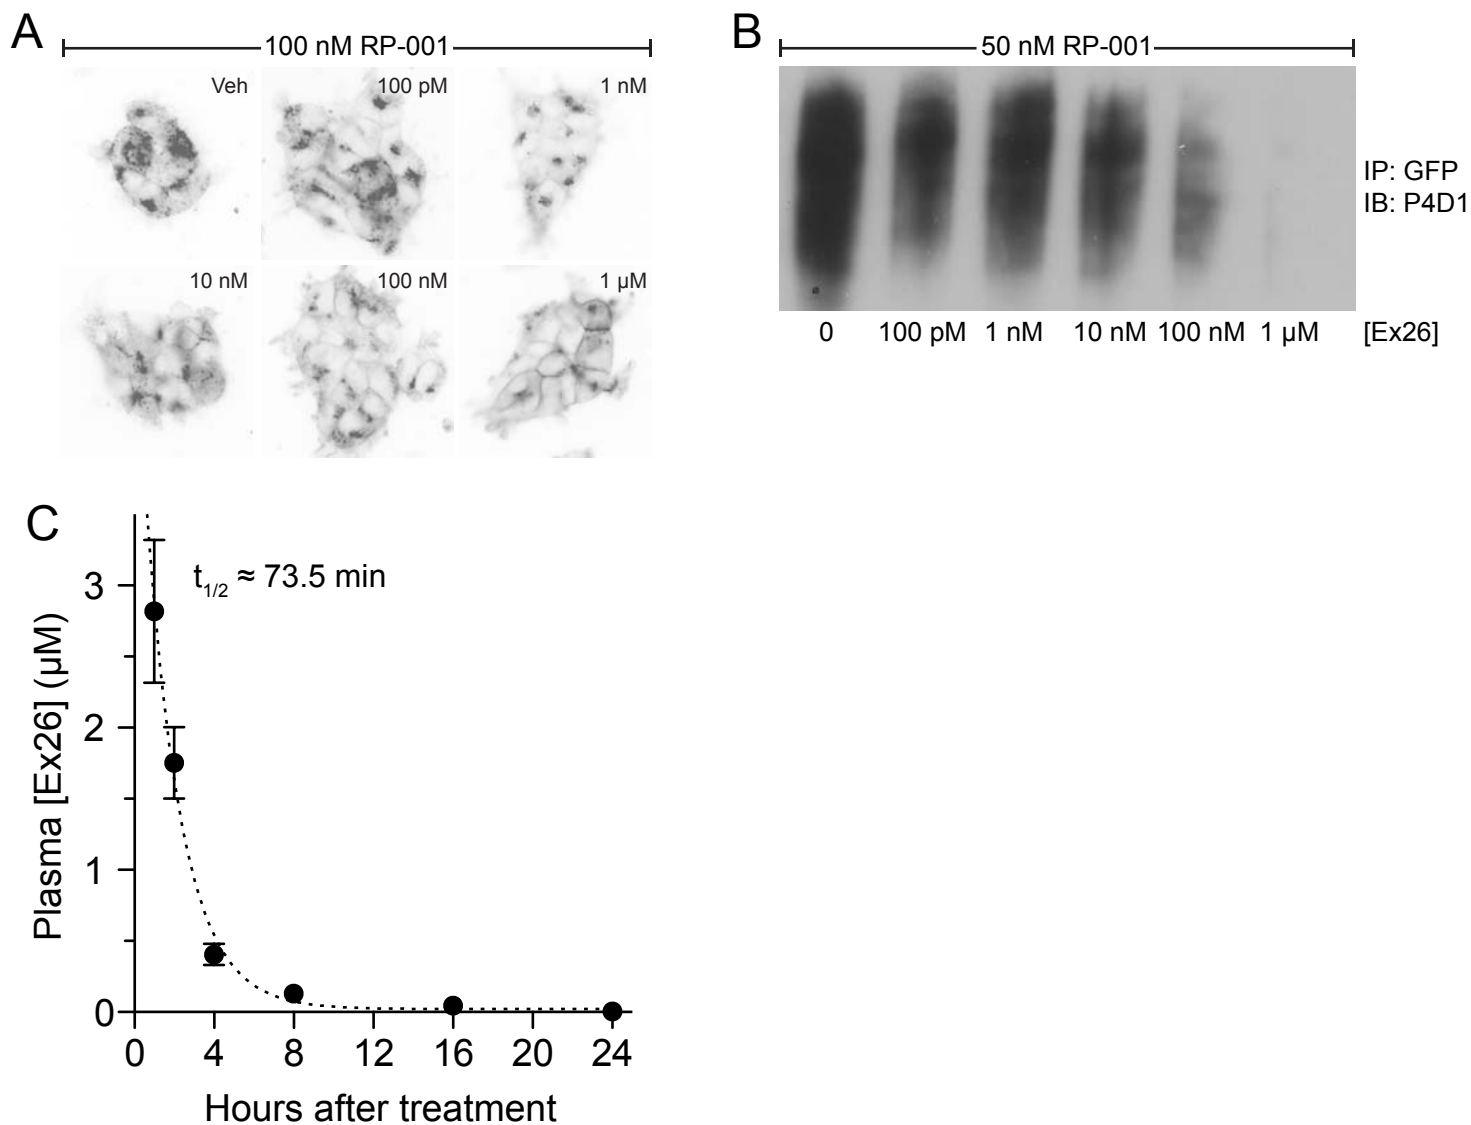

**Supplemental Figure 1:** Ex26 inhibits S1P1 internalization and polyubiquitinylation in vitro and exhibits a short half-life in vivo. **(A)** Ex26 inhibits S1P1 internalization induced by the S1P1 agonist RP-001 in vitro. HEK cells expressing S1P1-eGFP were pretreated with the indicated concentrations of Ex26 for 1 hour, and then were incubated in the presence of 100 nM RP-001 for an additional hour. **(B)** Ex26 inhibits RP-001-induced polyubiquitinylation. Cells were treated as in (A), but were incubated with 50 nM RP-001. Lysates were immunoprecipitated with an antibody specific to GFP, then blotted for P4D1 to detect ubiquitin. **(C)** Ex26 has a relatively short half-life following treatment with 3 mg/kg i.p. All data are representative of at least two experiments, with (C) utilizing 4 mice per group per experiment.

Stuart M. Cahalan, Pedro J. Gonzalez-Cabrera, Nhan Nguyen,  
Miguel Guerrero, Elizabeth A. George Cisar, Nora B. Leaf, Steven J. Brown,  
Edward Roberts, and Hugh Rosen

S1P1 Receptor Upregulation and Amelioration of  
Experimental Autoimmune Encephalomyelitis by an S1P1 Antagonist  
Molecular Pharmacology

## Supplemental Figure 2

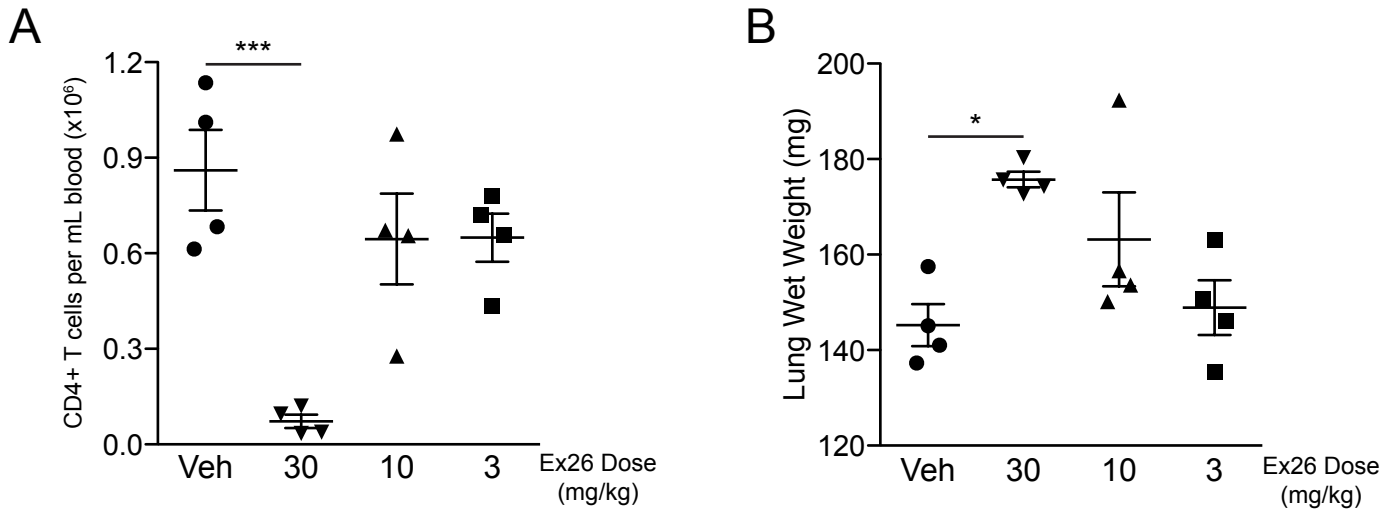

**Supplemental Figure 2:** High dose Ex26 can cause sustained lymphocyte sequestration and pulmonary edema. **(A)** CD4+ T cell counts from the blood of mice treated i.p. 24 hours previously with the indicated doses of Ex26. **(B)** Lung wet weights of mice treated i.p. 24 hours previously with the indicated doses of Ex26. Graphs are representative of two experiments, with 4 mice per group per experiment and are plotted as mean  $\pm$  S.E.M. \*  $p < 0.05$ , \*\*\*  $p < 0.001$  as determined by one-way ANOVA with Bonferroni's multiple comparison post-test.
